# Supplementary material for: A comparison of methods to estimate vertical land motion trends from GNSS and altimetry at tide gauge stations
Source: Copernicus journal article supplement (doi:10.5194/os-14-187-2018), 2018-03-15
Supplement: Supplementary file [file os-14-187-2018-supplement-title-page.pdf › os-14-187-2018-supplement-title-page.pdf]

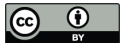

## *Supplement of*

# **A comparison of methods to estimate vertical land motion trends from GNSS and altimetry at tide gauge stations**

**Marcel Kleinherenbrink et al.**

*Correspondence to:* Marcel Kleinherenbrink ([m.kleinherenbrink@tudelft.nl](mailto:m.kleinherenbrink@tudelft.nl))

- [os-14-187-2018-supplement-title-page.pdf](#)
- [ALT-TGpresentdaymass.zip](#)
- [ALT-TGtrends.zip](#)
- [GNSSmedianTrends.ascii](#)
- [GNSSpresentdaymass.zip](#)
- [GNSStrends.zip](#)
- [README.txt](#)

The copyright of individual parts of the supplement might differ from the CC BY 4.0 License.
